# Supplementary material
Source: PubMed Central journal article supplement (PMC5600500)
Supplement: NIHMS895104-supplement.pdf [file NIHMS895104-supplement.pdf]

## Supplementary figures

Figure S1.

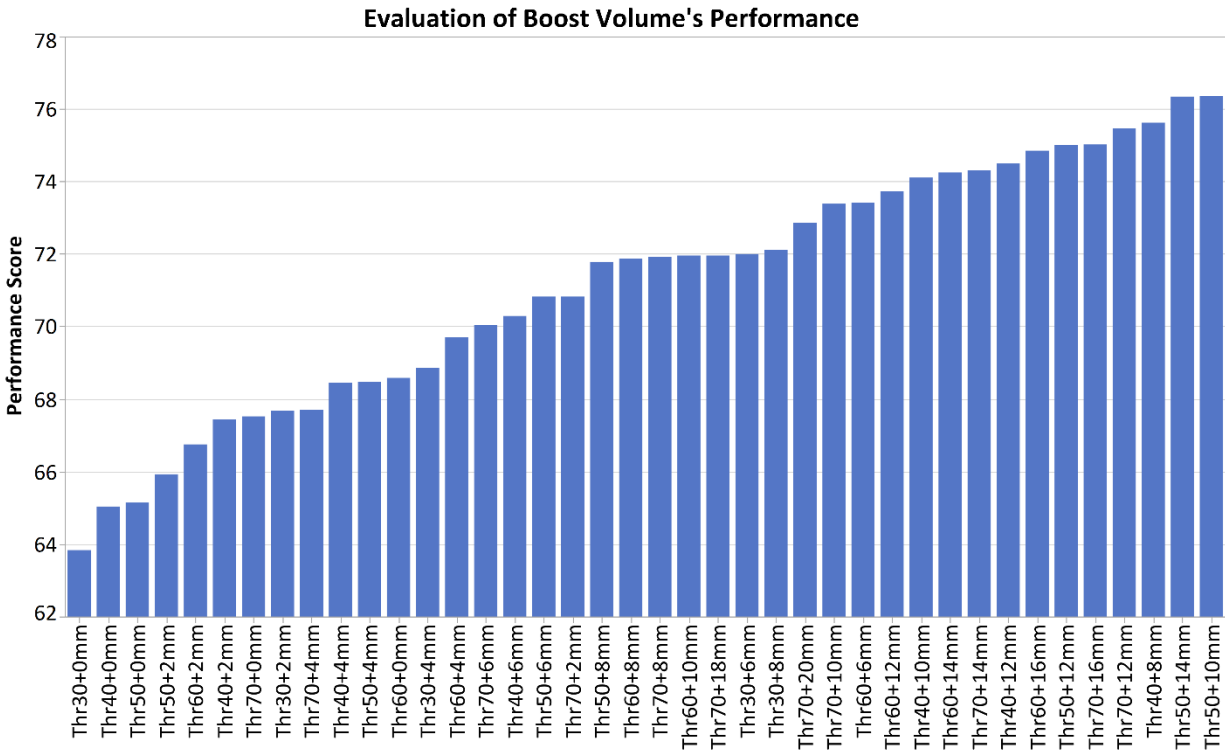

Performance score for each BTV used in this study. Volumes greater than CTV1 were excluded.

Figure S2.

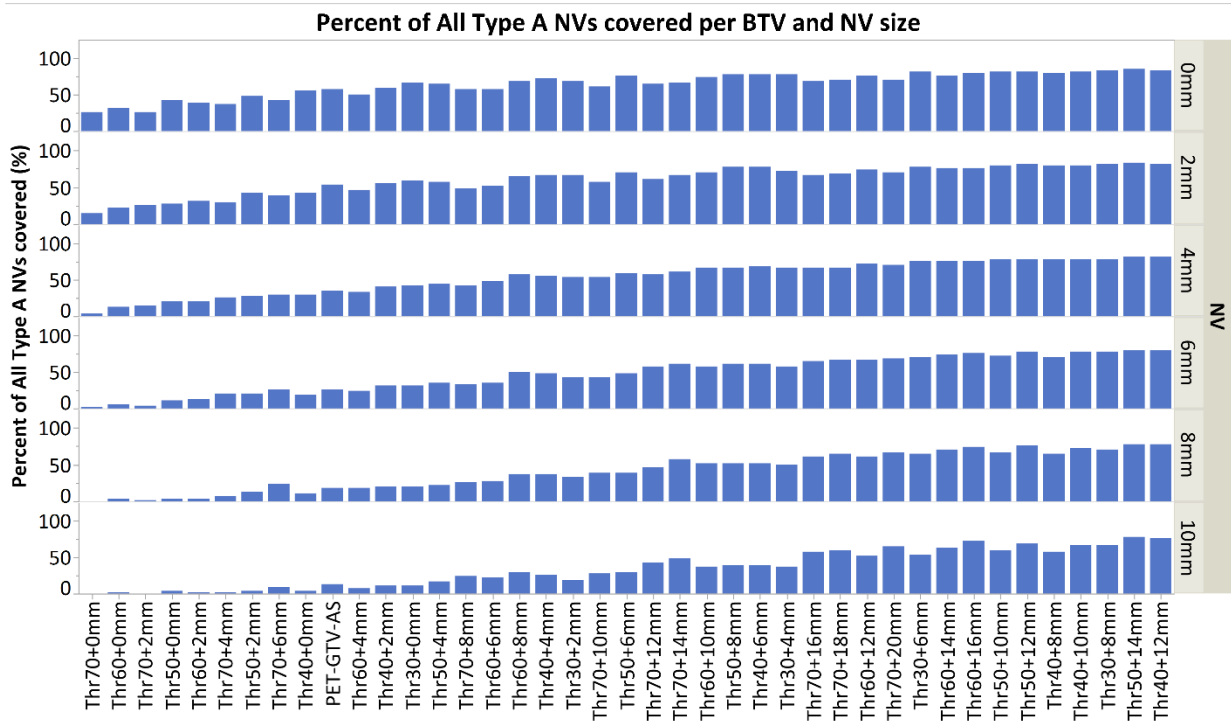

This figure shows coverage data for all recurrent volumes per nidus radius size and boost volume. Boost volumes are ordered per increasing coverage for 4mm nidus data.

Figure S3.

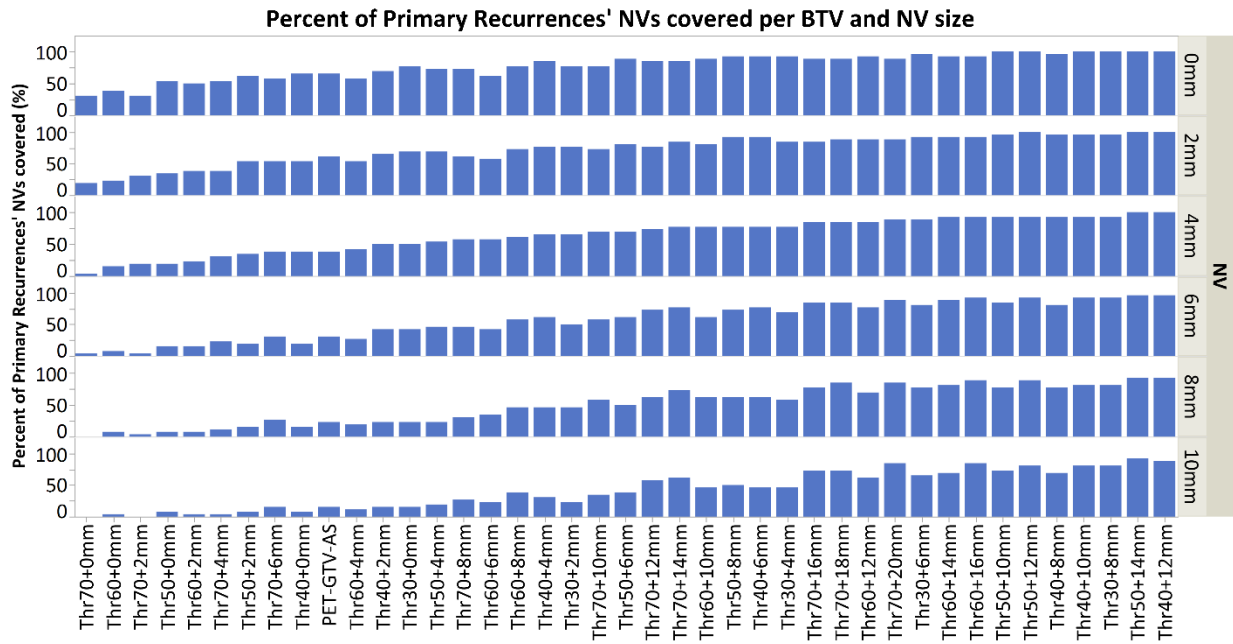

This figure shows coverage data for primary recurrent volumes per nidus radius size and boost volume. Boost volumes are ordered per increasing coverage for 4mm nidus data. In addition, Robustness is included to show the difference per volume between 0mm and 10mm nidus coverage.

Figure S4.

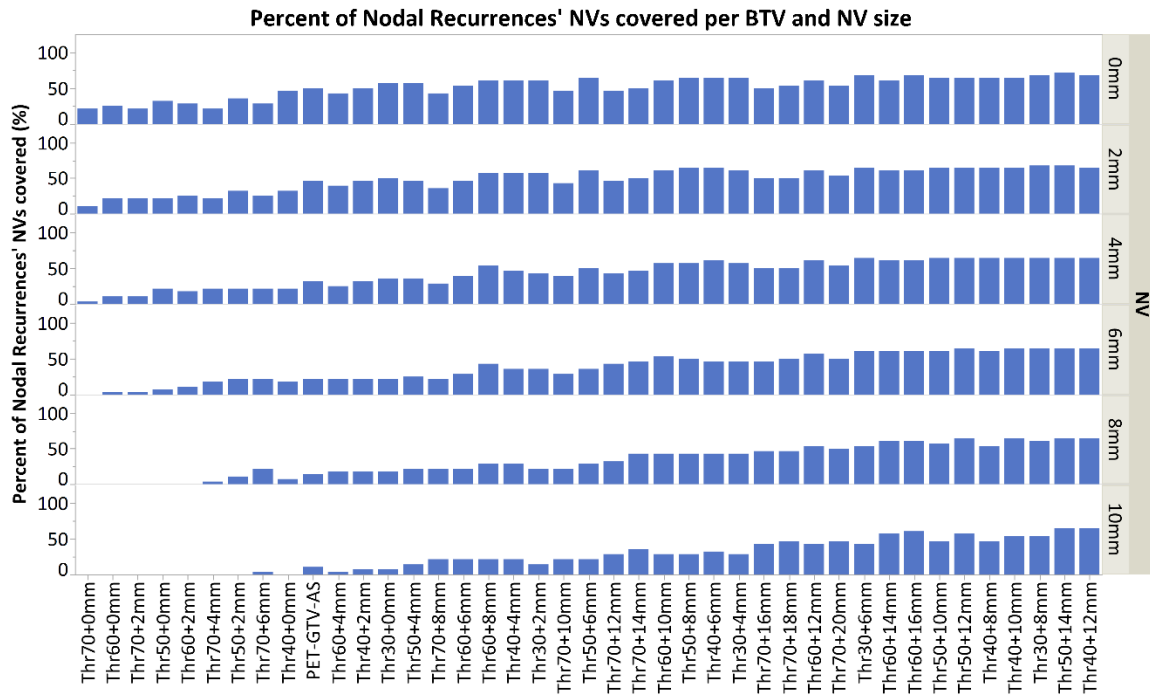

This figure shows coverage data for node recurrent volumes per nidus radius size and boost volume.

Boost volumes are ordered per increasing coverage for 4mm nidus data.
